# Supplementary material for: An integrated computational tool to model the broadening of the absorption bands of flexible dyes in solution: cationic chromophores as test cases
Source: Royal Society of Chemistry journal article supplement (doi:10.1039/c4cp03419h), 2014-10-28
Supplement: c4cp03419h1.pdf [file c4cp03419h1.pdf]

## Supplementary Information

# An integrated computational tool to model the broadening of absorption bands of flexible dyes in solution: cationic chromophores as test cases

**Enrico Benassi,<sup>a\*</sup> Chiara Cappelli,<sup>b</sup> Benedetta Carlotti,<sup>c</sup> and Vincenzo Barone<sup>a\*</sup>**

<sup>a</sup> Scuola Normale Superiore, Piazza dei Cavalieri 7, 56126 Pisa (Italy).

<sup>b</sup> Dipartimento di Chimica e Chimica Industriale, Università di Pisa, via Risorgimento 35, 56126 Pisa (Italy).

<sup>c</sup> Department of Chemistry, Biology and Biotechnology and Centro di Eccellenza sui Materiali Innovativi Nanostrutturati (CEMIN), University of Perugia, via Elce di Sotto 8, 06123 Perugia (Italy).

\* To whom the correspondence should be addressed to: [enrico.benassi@sns.it](mailto:enrico.benassi@sns.it) ; [vincenzo.barone@sns.it](mailto:vincenzo.barone@sns.it)

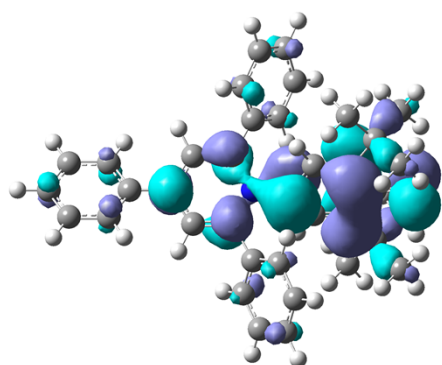

HOMO

(-4.6730 eV)

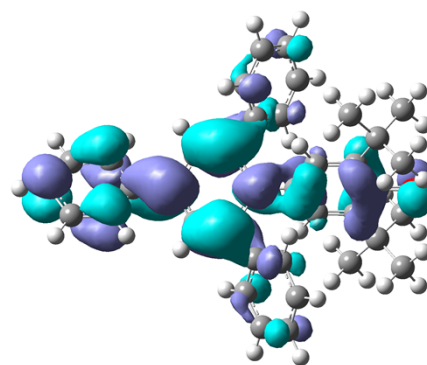

LUMO

(-3.182 eV)

**Figure SI.1.** Plot of the frontier molecular orbitals of the betaine dye **B**. Level of theory: DFT PBE0/SNSD/IEF-PCM (solvent = 1,4-dioxane).

**Table SI.1.** Sum of partial atomic Mulliken charges ( $Q$ ) of the atoms forming the methyl–pyridinium or methyl–quinolinium ring (moiety A) and of the rest of the system (moiety B), and electric dipole moment *moduli* ( $\mu$ ), when  $S_0$  or the adiabatic  $S_1$  are populated.  $\theta(\mu_0, \mu_1)$  is the angle defined by the two vectors  $\mu_0$  and  $\mu_1$ . Level of theory: DFT CAM–B3LYP/6–31+G\*/IEF–PCM (solvent = DCM).

|          | $S_0$                 |                       |                    | $S_1$                 |                       |                    | $\theta(\mu_0, \mu_1) / \text{degs}$ |
|----------|-----------------------|-----------------------|--------------------|-----------------------|-----------------------|--------------------|--------------------------------------|
|          | $Q_0(\text{A}) /  e $ | $Q_0(\text{B}) /  e $ | $\mu_0 / \text{D}$ | $Q_1(\text{A}) /  e $ | $Q_1(\text{B}) /  e $ | $\mu_1 / \text{D}$ |                                      |
| <b>1</b> | 0.488                 | 0.512                 | 7.1                | 0.206                 | 0.794                 | 3.1                | 116                                  |
| <b>2</b> | 0.230                 | 0.385                 | 0.9                | –0.074                | 0.537                 | 4.2                | 6                                    |
| <b>3</b> | 1.409                 | –0.409                | 9.9                | 0.567                 | 0.433                 | 2.6                | 92                                   |
| <b>4</b> | 2.155                 | –1.155                | 1.6                | 0.174                 | 0.826                 | 9.4                | 112                                  |
| <b>5</b> | 1.041                 | –0.041                | 2.9                | 0.631                 | 0.369                 | 8.5                | 137                                  |
| <b>6</b> | 0.943                 | 0.057                 | 17.7               | 0.640                 | 0.360                 | 6.0                | 14                                   |
| <b>7</b> | 1.291                 | –0.291                | 17.9               | 1.016                 | –0.016                | 5.0                | 13                                   |

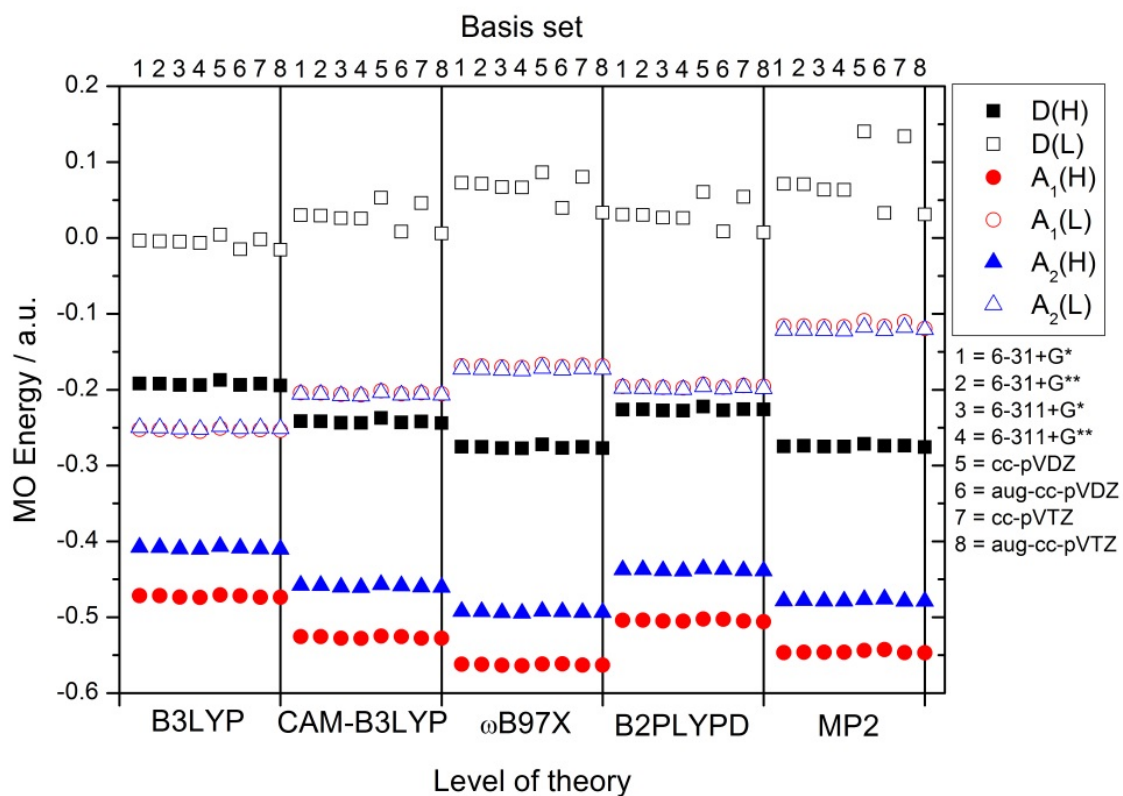

**Figure SI.2.** Evaluation of the frontier MOs of dimethylamino–benzene (D), methyl–pyridinium (A<sub>1</sub>) and methyl–quinolinium (A<sub>2</sub>), at different levels of theory.
